# Antihyperglycemic treatment in patients with type 2 diabetes in Italy: the impact of age and kidney function

Sandro Gentile<sup>1</sup>, Pamela Piscitelli<sup>2</sup>, Francesca Viazzi<sup>3</sup>, Giuseppina Russo<sup>4</sup>, Antonio Ceriello<sup>5,6</sup>, Carlo Giorda<sup>7</sup>, Piero Guida<sup>8</sup>, Paola Fioretto<sup>9</sup>, Roberto Pontremoli<sup>3</sup>, Felice Strollo<sup>10</sup>, Salvatore De Cosmo<sup>2</sup> and The AMD-Annals Study Group<sup>11</sup>

<sup>1</sup>Department of Clinical and Experimental Medicine, University of Campania, Naples, Italy

<sup>2</sup>IRCSS Casa Sollievo della Sofferenza – Unit of Internal Medicine, Scientific Institute, San Giovanni Rotondo, Italy

<sup>3</sup>Università degli Studi, IRCCS Azienda Ospedaliera Universitaria San Martino-IST, Istituto Nazionale per la Ricerca sul Cancro, Genova, Italy

<sup>4</sup>Department of Clinical and Experimental Medicine, University of Messina, Messina, Italy

<sup>5</sup>Insititut d'Investigacions Biomèdiques August Pi i Sunyer (IDIBAPS) and Centro de Investigación Biomédica en Red de Diabetes y Enfermedades Metabólicas Asociadas (CIBERDEM), Barcelona, Spain

<sup>6</sup>U.O. Diabetologia e Malattie Metaboliche, Multimedica IRCCS, Milano, Italy

<sup>7</sup>Diabetes and Metabolism Unit, ASL Turin 5, Turin, Italy

<sup>8</sup>Statistical Consultant for Associazione Medici Diabetologi (AMD), Rome, Italy

<sup>9</sup>Department of Medicine, University of Padova, Padova, Italy

<sup>10</sup>Endocrinology and Metabolism, Elle-di, Rome, Italy

<sup>11</sup>Associazione Medici Diabetologi (AMD), Rome, Italy

**Correspondence to:** Salvatore De Cosmo, **email:** sdecosm@tin.it  
Sandro Gentile, **email:** s.gentile1949@gmail.com

**Keywords:** type 2 diabetes mellitus, nephropathy, age, antihyperglycemic treatment, eGFR

**Received:** May 03, 2017

**Accepted:** May 10, 2017

**Published:** June 28, 2017

**Copyright:** Gentile et al. This is an open-access article distributed under the terms of the Creative Commons Attribution License 3.0 (CC BY 3.0), which permits unrestricted use, distribution, and reproduction in any medium, provided the original author and source are credited.

## ABSTRACT

**We describe AHA utilization pattern according to age and renal function in type 2 diabetes mellitus (T2DM), in real-life conditions.**

The analysis was performed using the data set of electronic medical records collected between 1 January and 31 December, 2011 in 207 Italian diabetes centers. The study population consisted of 157,595 individuals with T2DM. The AHA treatment regimens was evaluated. Kidney function was assessed by eGFR, estimated using the CKD-EPI formula. Other determinations: HbA1c, blood pressure (BP), low- density lipoprotein (LDL-c), total and high density lipoprotein cholesterol (TC and HDL-c), triglycerides (TG) and serum uric acid (SUA). Quality of care was assessed through Q score.

The proportion of subjects taking metformin declined progressively across age quartiles along with eGFR values, but remained high in oldest subjects (i.e. 54.5 %). On the other hand, the proportion of patients on secretagogues or insulin increased with aging (i.e. 54.7% and 37% in the fourth age quartile, respectively). The percentage of patients with low eGFR (i.e. <30 ml/min/1.73m<sup>2</sup>) taking either metformin or sulphonylureas/repaglinide was particularly high (i.e. 15.3% and 34.3% respectively).

In a large real-life cohort of T2DM, metformin or sulphonylureas/repaglinide, although not recommended, are frequently prescribed to elderly subjects with severe kidney disease.

## INTRODUCTION

Diabetes has been estimated to account for approximately 1.5 million deaths in 2012, with more than 80% of diabetes-related deaths in low- and middle-income countries [1]. Lifestyle modification and glucose-lowering drug treatment are the mainstay of therapy to prevent and delay diabetes-related complications [2–3].

Even though a large number of antihyperglycemic agents are approved for type 2 diabetes (T2DM), major T2DM treatment guidelines suggest metformin as first-line drug treatment, and, if glycemic control is not achieved, the addition of a second drug is recommended [2–3].

Accordingly, in real-life conditions the majority of people with T2DM take metformin alone or in combination, although prescription is not always appropriate with regards to age and renal function limitations [4–6]. In fact, while the cardiovascular benefits associated to the use of metformin have been described, a careful assessment of kidney function is necessary prior to prescribe this drug as it is primarily eliminated via the kidney [7]. More recently, limitations on the use of this drug in individuals with mild or moderate impairment of renal function have been disputed [8–10], because of poor evidence on a specific safety threshold and the lack of clear-cut evidence supporting increased risk of complications (especially lactic acidosis) in the presence of mild or moderate renal impairment. Nonetheless, it is agreed upon that this drug should not be used in the presence of severe kidney dysfunction, i.e. GFR below 30 ml/min/1.73m<sup>2</sup> [2–3].

Age also needs to be taken into account when choosing antihyperglycemic agents in the clinical setting. This is mainly due to a well known reduction in GFR with aging which may foster the risk of severe hypoglycemic events [11]. To date, only few large studies have investigated the impact of age and impaired kidney function on the use of antihyperglycemic drugs, mainly metformin, in real-life clinical conditions [10, 12–13].

In this context, the large database of the AMD Annals initiative [14] provides a unique opportunity to analyse prescription patterns in Italy and correlate them with the quality of care, assessed through a validated score (Q score).

Therefore, aim of this report was to assess antihyperglycemic treatment, mainly focused on metformin use, in a large sample of patients with T2DM, according to age and kidney function in real-life conditions.

## RESULTS

Clinical features of the whole study sample are reported in Table 1. Overall, the mean age of the participating patients was 68±11 years, 56.7% patients were males and the mean duration of diabetes was 11±9 years. Mean BMI was 30±5 Kg/m<sup>2</sup>. Glycemic control, as

well as, lipid parameters and BP levels were fairly good, being mean HbA1c, LDL-c and BP values 7.2± 1.3%, 101±33 mg/dL and 137±18/7±89 mmHg, respectively. Mean eGFR was 76±21 mL/min/1.73m<sup>2</sup>. In Table 1 we describe also participants' clinical characteristics according to age quartiles. Older participants had longer duration of diabetes; lower BMI, waist circumference and triglyceride levels, as well as, higher HDL-c. Systolic BP and antihypertensive treatment rate increased with age, while the percentage of current smokers decreased. It is worth noting that mean HbA1c was 7.1% in patients in the fourth quartile (mean age 81 years), thus indicating that almost half of patients within this class had HbA1c values below 7.0% and therefore were, very likely, overtreated.

As expected, serum creatinine increased and eGFR declined progressively as a function of age. Prevalence of patients with eGFR <60 ml/min/1.73m<sup>2</sup> increased across age quartiles from 4.8% in the first to 45.3% in the forth quartile. The proportion of both micro- and macroalbuminuria also significantly increased with age (Table 1).

Antihyperglycemic drugs utilization rate in the whole population and across the age quartiles is also reported in Table 1. Patients taking metformin decreased with age, being 77.1% in the lowest quartile and 54.5% in the highest quartile. Use of pioglitazone (the only thiazolidinedione available in Italy) also decreased across age quartiles and eGFR classes, while treatment with sulphonilureas/repaglinide or insulin increased from the lowest to the highest quartile.

The quality of care, as indicated by Q score, was similar across age quartiles (Supplementary Figure 1).

In Table 2 the clinical features of our population are described as stratified according to eGFR classes. Age, duration of diabetes, triglyceride levels, presence of retinopathy, prevalence rates of micro- and macroalbuminuria, as well as, of antihypertensive, lipid-lowering and antiplatelet treatments increased along with eGFR decrease. However, although metformin utilization decreased in parallel with eGFR values, it is worth to underline that 617 (15.3%) patients with eGFR below 30 ml/min/1.73m<sup>2</sup> were kept on metformin (alone or in combination with other oral hypoglycaemic agents or insulin). Similarly sulphonilureas/repaglinide utilization also decreased in patents with low eGFR but a large percentage of patients with eGFR <30 ml/min/1.73m<sup>2</sup> was still taking sulphonilureas/repaglinide. Finally, insulin utilization rate increased with decreased eGFR as expected, and in fact 68.4% of patients with eGFR <30 ml/min/1.73m<sup>2</sup> was on insulin treatment.

The quality of care, as indicated by Q score, was similar across eGFR classes (Supplementary Figure 1).

When grouping the whole sample according to antihyperglycemic treatment (Supplementary Table 1), patients on insulin (alone or in combination with metformin) turned out to be older and had a longer duration of

**Table 1: Clinical characteristics of the whole sample and divided according to age quartiles**

|                                              | All              | <62 years        | 62-69 years   | 70-75 years   | >75 years     | p      |
|----------------------------------------------|------------------|------------------|---------------|---------------|---------------|--------|
|                                              | n=157595         | n=39407          | n=39394       | n=39404       | n=39390       |        |
| Male sex (n)                                 | 89290<br>(56.7%) | 24674<br>(62.6%) | 23345 (59.3%) | 22140 (56.2%) | 19131 (48.6%) | <0.001 |
| Age (years)                                  | 68±11            | 53±7             | 65±2          | 72±2          | 81±4          | -      |
| Former smokers (n)                           | 25875<br>(29.3%) | 6207<br>(25.6%)  | 7355 (32.3%)  | 6741 (31.4%)  | 5572 (28.0%)  | <0.001 |
| Current smokers (n)                          | 14793<br>(16.7%) | 6605<br>(27.2%)  | 4238 (18.6%)  | 2617 (12.2%)  | 1333 (6.7%)   | <0.001 |
| Age at DM diagnosis (years)                  | 56±12            | 45±9             | 54±8          | 59±9          | 65±11         | <0.001 |
| Known duration of diabetes (years)           | 11±9             | 8±7              | 10±8          | 13±9          | 15±11         | <0.001 |
| HbA1c (%)                                    | 7.2±1.3          | 7.3±1.5          | 7.2±1.3       | 7.2±1.2       | 7.2±1.2       | <0.001 |
| BMI (Kg/m <sup>2</sup> )                     | 30±5             | 30±6             | 30±5          | 29±5          | 28±5          | <0.001 |
| BMI Men (Kg/m <sup>2</sup> )                 | 29±5             | 30±5             | 30±5          | 29±4          | 28±4          | <0.001 |
| BMI Women (Kg/m <sup>2</sup> )               | 30±6             | 31±7             | 31±6          | 30±6          | 29±5          | <0.001 |
| Waist circumference (cm)                     | 104±13           | 104±14           | 104±13        | 103±12        | 102±12        | <0.001 |
| Waist circumference Men (cm)                 | 104±12           | 105±13           | 105±12        | 104±12        | 104±11        | <0.001 |
| Waist circumference Women (cm)               | 102±13           | 103±15           | 103±13        | 102±13        | 101±12        | <0.001 |
| Triglycerides (mg/dL)                        | 137±90           | 151±118          | 137±82        | 132±84        | 128±69        | <0.001 |
| HDL (mg/dL)                                  | 50±14            | 48±14            | 50±14         | 51±14         | 52±15         | <0.001 |
| HDL Men (mg/dL)                              | 47±13            | 45±13            | 47±13         | 48±13         | 48±14         | <0.001 |
| HDL Women (mg/dL)                            | 54±15            | 53±15            | 54±14         | 54±15         | 55±15         | <0.001 |
| LDL (mg/dL)                                  | 101±33           | 106±34           | 100±33        | 99±32         | 100±33        | <0.001 |
| Non-HDL (mg/dL)                              | 128±37           | 135±40           | 127±37        | 124±36        | 125±36        | <0.001 |
| Systolic BP (mmHg)                           | 137±18           | 132±17           | 137±18        | 139±19        | 140±19        | <0.001 |
| Diastolic BP (mmHg)                          | 78±9             | 80±10            | 78±9          | 77±9          | 76±9          | <0.001 |
| Pulse pressure (mmHg)                        | 59±16            | 53±14            | 59±15         | 62±16         | 64±17         | <0.001 |
| Albuminuria (n)                              | 45387<br>(28.8%) | 9843<br>(25.0%)  | 10645 (27.0%) | 11535 (29.3%) | 13364 (33.9%) | <0.001 |
| Microalbuminuria (n)                         | 35801<br>(22.7%) | 7989<br>(20.3%)  | 8392 (21.3%)  | 8995 (22.8%)  | 10425 (26.5%) | <0.001 |
| Macroalbuminuria (n)                         | 9586 (6.1%)      | 1854 (4.7%)      | 2253 (5.7%)   | 2540 (6.4%)   | 2939 (7.5%)   | <0.001 |
| Serum creatinine (mg/dL)                     | 0.98±0.54        | 0.86±0.41        | 0.93±0.50     | 1.01±0.55     | 1.10±0.63     | <0.001 |
| eGFR (mL/min/1.73 m <sup>2</sup> )           | 76±21            | 93±17            | 80±17         | 72±18         | 61±19         | <0.001 |
| Retinopathy (n)                              | 22250<br>(14.1%) | 4314<br>(10.9%)  | 5729 (14.5%)  | 6259 (15.9%)  | 5948 (15.1%)  | <0.001 |
| Antihyperglycemic treatments - Lifestyle (n) | 8229 (5.2%)      | 2114 (5.4%)      | 2145 (5.4%)   | 2150 (5.5%)   | 1820 (4.6%)   | <0.001 |

*(Continued)*

|                                        | All               | <62 years        | 62-69 years   | 70-75 years   | >75 years     | p      |
|----------------------------------------|-------------------|------------------|---------------|---------------|---------------|--------|
|                                        | n=157595          | n=39407          | n=39394       | n=39404       | n=39390       |        |
| Antihypertensive treatment (n)         | 112424<br>(71.3%) | 21788<br>(55.3%) | 28342 (71.9%) | 30543 (77.5%) | 31751 (80.6%) | <0.001 |
| Treatment with ACE-Is/ARBs (n)         | 95821<br>(60.8%)  | 18940<br>(48.1%) | 24518 (62.2%) | 26103 (66.2%) | 26260 (66.7%) | <0.001 |
| Lipid-lowering treatment (n)           | 90690<br>(57.5%)  | 19866<br>(50.4%) | 24362 (61.8%) | 24674 (62.6%) | 21788 (55.3%) | <0.001 |
| Treatment with statins (n)             | 83342<br>(52.9%)  | 17464<br>(44.3%) | 22392 (56.8%) | 22947 (58.2%) | 20539 (52.1%) | <0.001 |
| Aspirin (n)                            | 35284<br>(22.4%)  | 5514<br>(14.0%)  | 8872 (22.5%)  | 10253 (26.0%) | 10645 (27.0%) | <0.001 |
| eGFR<60 mL/min/1.73 m <sup>2</sup> (n) | 35166<br>(22.3%)  | 1879 (4.8%)      | 5335 (13.5%)  | 10113 (25.7%) | 17839 (45.3%) | <0.001 |
| HbA1c ≥7% (n)                          | 79889<br>(51.4%)  | 20147<br>(52.0%) | 19292 (49.7%) | 19675 (50.6%) | 20775 (53.5%) | <0.001 |
| Total cholesterol (mg/dL)              | 177±39            | 182±40           | 176±38        | 175±37        | 176±38        | <0.001 |
| Triglycerides ≥150 mg/dl               | 45467<br>(30.9%)  | 13530<br>(36.3%) | 11713 (31.5%) | 10610 (28.8%) | 9614 (26.7%)  | <0.001 |
| HDL <40M <50F mg/dL (n)                | 52108<br>(36.0%)  | 14797<br>(40.3%) | 13057 (35.7%) | 12076 (33.4%) | 12178 (34.4%) | <0.001 |
| LDL ≥100 mg/dL (n)                     | 69295<br>(48.1%)  | 19715<br>(54.4%) | 16990 (46.7%) | 16209 (44.8%) | 16381 (46.4%) | <0.001 |
| Blood Pressure ≥140/85 mmHg (n)        | 71462<br>(53.5%)  | 15552<br>(45.8%) | 18069 (53.5%) | 19204 (57.1%) | 18637 (58.0%) | <0.001 |
| Treatment with fibrates (n)            | 4588 (2.9%)       | 1652 (4.2%)      | 1210 (3.1%)   | 1011 (2.6%)   | 715 (1.8%)    | <0.001 |
| Metformin (n)                          | 108234<br>(68.7%) | 30389<br>(77.1%) | 29574 (75.1%) | 26798 (68.0%) | 21473 (54.5%) | <0.001 |
| Sulphonylureas/Repaglinide (n)         | 76869<br>(48.8%)  | 16450<br>(41.7%) | 18871 (47.9%) | 19996 (50.7%) | 21552 (54.7%) | <0.001 |
| Acarbose (n)                           | 4613 (2.9%)       | 937 (2.4%)       | 1099 (2.8%)   | 1233 (3.1%)   | 1344 (3.4%)   | <0.001 |
| Glitazones (n)                         | 4280 (2.7%)       | 1250 (3.2%)      | 1263 (3.2%)   | 1090 (2.8%)   | 677 (1.7%)    | <0.001 |
| Insulin (n)                            | 48831<br>(31.0%)  | 10754<br>(27.3%) | 11017 (28.0%) | 12489 (31.7%) | 14571 (37.0%) | <0.001 |

Mean±SD or absolute frequency (percentage). ACE-Is=angiotensin converting enzyme-inhibitors, ARBs=angiotensin II receptor antagonists, BMI=body mass index, BP=blood pressure, eGFR=estimated glomerular filtration rate, HbA1c=glycated hemoglobin, HDL =high-density lipoprotein cholesterol, LDL =low-density lipoprotein cholesterol. Patients' missing data: age at diagnosis and duration of diabetes in 8435 (5.4%), BMI in 14918 (9.5%), Waist circumference in 111567 (70.8%), HbA1c in 2291 (1.5%), total cholesterol in 8127 (5.2%), triglycerides in 10293 (6.5%), HDL-c in 12812 (8.1%), LDL-c in 13495 (8.6%), Non-HDL in 13799 (8.8%), serum uric acid in 81772 (51.9%), GGT in 75760 (48.1%), AST/GOT in 47264 (30%), ALT/GPT in 42967 (27.3%), blood pressure in 24106 (15.3%), and smoking status in 69213 (43.9%). The p values refer to significance of mixed regression models (linear for continuous and logistic for categorical variables) with age quartiles as dependent variables.

disease, a lower eGFR and a higher prevalence of micro-macroalbuminuria as compared to those taking either metformin alone or other antihyperglycemic agents.

Then we analysed the distribution of antihyperglycemic agents according to both age and eGFR categories it appeared evident, although unexpected, that metformin

**Table 2: Clinical characteristics of the whole sample and divided according to classes of estimated Glomerular Filtration Rate**

|                                              | GFR>90        | GFR 60-90     | GFR 30-60     | GFR<30       | Overall |
|----------------------------------------------|---------------|---------------|---------------|--------------|---------|
|                                              | n=47254       | n=75175       | n=31137       | n=4029       | p       |
| Male sex (n)                                 | 28595 (60.5%) | 43080 (57.3%) | 15712 (50.5%) | 1903 (47.2%) | <0.001  |
| Age (years)                                  | 59±10         | 70±9          | 75±8          | 76±9         | <0.001  |
| Former smokers (n)                           | 7612 (26.9%)  | 12657 (30.5%) | 4975 (30.3%)  | 631 (29.9%)  | <0.001  |
| Current smokers (n)                          | 7083 (25.0%)  | 5858 (14.1%)  | 1658 (10.1%)  | 194 (9.2%)   | <0.001  |
| Age at DM diagnosis (years)                  | 50±11         | 58±11         | 60±12         | 59±13        | <0.001  |
| Known duration of diabetes (years)           | 9±8           | 12±9          | 14±10         | 17±11        | <0.001  |
| HbA1c (%)                                    | 7.3±1.4       | 7.2±1.3       | 7.3±1.3       | 7.3±1.3      | <0.001  |
| BMI (Kg/m <sup>2</sup> )                     | 30±6          | 29±5          | 30±5          | 30±5         | <0.001  |
| BMI Men (Kg/m <sup>2</sup> )                 | 29±5          | 29±5          | 29±5          | 29±5         | <0.001  |
| BMI Women (Kg/m <sup>2</sup> )               | 31±6          | 30±6          | 30±6          | 31±6         | <0.001  |
| Waist circumference (cm)                     | 103±13        | 103±12        | 105±12        | 107±13       | <0.001  |
| Waist circumference Men (cm)                 | 104±13        | 104±12        | 106±12        | 108±13       | <0.001  |
| Waist circumference Women (cm)               | 102±14        | 102±13        | 104±13        | 105±13       | <0.001  |
| Triglycerides (mg/dL)                        | 135±97        | 132±84        | 149±94        | 163±96       | <0.001  |
| HDL (mg/dL)                                  | 50±14         | 51±14         | 49±14         | 46±15        | <0.001  |
| HDL Men (mg/dL)                              | 47±13         | 48±13         | 45±13         | 42±13        | <0.001  |
| HDL Women (mg/dL)                            | 54±15         | 55±15         | 52±15         | 49±16        | <0.001  |
| LDL (mg/dL)                                  | 103±33        | 101±33        | 99±34         | 98±34        | <0.001  |
| Non-HDL (mg/dL)                              | 129±38        | 126±37        | 128±38        | 130±41       | <0.001  |
| Systolic BP (mmHg)                           | 134±18        | 138±18        | 139±19        | 139±20       | <0.001  |
| Diastolic BP (mmHg)                          | 79±9          | 78±9          | 77±10         | 75±10        | <0.001  |
| Pulse pressure (mmHg)                        | 56±15         | 60±16         | 62±17         | 63±18        | <0.001  |
| Albuminuria (n)                              | 11246 (23.8%) | 19681 (26.2%) | 12026 (38.6%) | 2434 (60.4%) | <0.001  |
| Microalbuminuria (n)                         | 9493 (20.1%)  | 16038 (21.3%) | 8877 (28.5%)  | 1393 (34.6%) | <0.001  |
| Macroalbuminuria (n)                         | 1753 (3.7%)   | 3643 (4.8%)   | 3149 (10.1%)  | 1041 (25.8%) | <0.001  |
| Serum creatinine (mg/dL)                     | 0.72±0.13     | 0.91±0.15     | 1.30±0.25     | 2.93±2.17    | -       |
| eGFR (mL/min/1.73 m <sup>2</sup> )           | 99±8          | 77±9          | 48±8          | 22±7         | -       |
| Retinopathy (n)                              | 5281 (11.2%)  | 10168 (13.5%) | 5759 (18.5%)  | 1042 (25.9%) | <0.001  |
| Antihyperglycemic treatments - Lifestyle (n) | 2424 (5.1%)   | 4414 (5.9%)   | 1280 (4.1%)   | 111 (2.8%)   | <0.001  |
| Antihypertensive treatment (n)               | 27506 (58.2%) | 54777 (72.9%) | 26553 (85.3%) | 3588 (89.1%) | <0.001  |
| Treatment with ACE-Is/ ARBs (n)              | 23520 (49.8%) | 46837 (62.3%) | 22714 (72.9%) | 2750 (68.3%) | <0.001  |

*(Continued)*



|                                    | GFR>90        | GFR 60-90     | GFR 30-60      | GFR<30        | Overall |
|------------------------------------|---------------|---------------|----------------|---------------|---------|
|                                    | n=47254       | n=75175       | n=31137        | n=4029        | p       |
| Lipid-lowering treatment (n)       | 24760 (52.4%) | 44003 (58.5%) | 19287 (61.9%)  | 2640 (65.5%)  | <0.001  |
| Treatment with statins (n)         | 22797 (48.2%) | 40737 (54.2%) | 17447 (56.0%)  | 2361 (58.6%)  | <0.001  |
| Aspirin (n)                        | 7679 (16.3%)  | 17615 (23.4%) | 8788 (28.2%)   | 1202 (29.8%)  | <0.001  |
| eGFR<60 mL/min/1.73 m <sup>2</sup> | 0 (0.0%)      | 0 (0.0%)      | 31137 (100.0%) | 4029 (100.0%) | -       |
| HbA1c ≥7%                          | 23573 (50.6%) | 37212 (50.2%) | 16963 (55.3%)  | 2141 (54.1%)  | <0.001  |
| Total cholesterol (mg/dL)          | 179±39        | 177±38        | 176±39         | 176±43        | <0.001  |
| Triglycerides ≥150 mg/dl (n)       | 12929 (29.0%) | 20049 (28.4%) | 10869 (38.0%)  | 1620 (45.2%)  | <0.001  |
| HDL <40M <50F mg/dL (n)            | 15516 (35.2%) | 22818 (33.0%) | 11907 (42.5%)  | 1867 (53.5%)  | <0.001  |
| LDL ≥100 mg/dL (n)                 | 22213 (51.0%) | 32993 (47.7%) | 12568 (45.1%)  | 1521 (43.8%)  | <0.001  |
| Blood Pressure ≥140/85 mmHg (n)    | 20000 (48.7%) | 35448 (55.5%) | 14283 (56.3%)  | 1731 (54.8%)  | <0.001  |
| Treatment with fibrates (n)        | 1170 (2.5%)   | 2049 (2.7%)   | 1218 (3.9%)    | 151 (3.7%)    | <0.001  |
| Metformin (n)                      | 37429 (79.2%) | 54434 (72.4%) | 15754 (50.6%)  | 617 (15.3%)   | <0.001  |
| Sulphonylureas/Repaglinide (n)     | 21684 (45.9%) | 38060 (50.6%) | 15742 (50.6%)  | 1383 (34.3%)  | <0.001  |
| Acarbose (n)                       | 1267 (2.7%)   | 2096 (2.8%)   | 1120 (3.6%)    | 130 (3.2%)    | <0.001  |
| Glitazones (n)                     | 1437 (3.0%)   | 2056 (2.7%)   | 725 (2.3%)     | 62 (1.5%)     | <0.001  |
| Insulin (n)                        | 12007 (25.4%) | 20693 (27.5%) | 13375 (43.0%)  | 2756 (68.4%)  | <0.001  |

Mean±SD or absolute frequency (percentage). Overall p value refers to the significance of model with eGFR in the four categories as explanatory variable. Adjusted p value refers to significance of regression coefficient of each variable in a mixed linear model with continuous eGFR as dependent variable. Legend as in Table 1.

and sulphonylureas/repaglinide were largely used in elderly patients in spite of very low eGFR (i.e. eGFR <30 ml/min/1.73m<sup>2</sup>) (Supplementary Table 2 and Figure 1).

## DISCUSSION

In this report, we assessed prescription patterns of AHA, mainly focused on metformin, according to age and kidney function in a large sample of patients with T2DM attending diabetes centers in Italy, in real-life conditions.

T2DM is a major health problem for the aging population and, therefore, older people (i.e. > 65 years) are highly prevalent among those attending diabetes centers, being in our series more than 50%. Age should be taken into account when choosing the most appropriate AHA, by keeping an eye not only on target HbA1c [2–3, 15], which often requires to be slightly higher than usual, but also, on progressive GFR decline occurring in people aged 65+.

It's worth emphasizing that about half of patients in the highest age quartile (i.e. median age: 80 years) had HbA1c levels below 7.0%. Thus, although a less stringent glycemic control is usually suggested in these patients [15], our findings could suggest the presence of a possibly overtreatment in real-life conditions.

A little proportion of our patients was on pioglitazone treatment. Given the well know side effects (i.e. fluid retention, heart failure, fractures), although not contraindicated, its use decreased in elderly and among patients with low or very low eGFR.

As expected, elderly persons had a lower eGFR. In this subgroup of patients, a large proportion (i.e. more than 50%) was treated with sulphonylureas/repaglinide and thus exposed to an increased risk of hypoglycemic events. In fact, a recent survey, investigating in a real-life condition the risk of severe hypoglycemia in 29,485 sulphonylurea treated diabetic patients shown as it was related to older age and decreased eGFR [16]. Older age and diabetic complication, together with diminished food intake, alcohol abuse, use of other medication and concomitant infection, were also the main causes of hospital admission-required hypoglycemia in an observational study including 16,865 T2DM patients from Capital Region of Denmark taking sulphonylureas [17].

Mainly based on data from the UKPDS sub-study related to overweight patients [18], nowadays international treatment guidelines recommend metformin as first-line AHA in patients with T2DM [2–3]. Despite no firm consensus on that, several observational studies

support the concept that metformin is effective, as well as, devoid of any increased risk of acidosis, also in patients with significant degree of renal impairment (i.e. eGFR between 60 and 30 ml/min/1.73m<sup>2</sup>) [19–22]. In fact, an observational study on 51,675 Swedish people with T2DM found no increased risk of acidosis in metformin users with eGFR of 30–45 ml/min/1.73m<sup>2</sup> compared with non-users [10]. More recently, a systematic review by Crowley et al. [9] further confirmed metformin to be associated with improvements in clinical outcomes in patients with moderate CKD, thus supporting the recent changes in metformin labeling.

Consequently, to prevent patients from missing beneficial effects of metformin, some health agencies, including the National Institute for Health and Clinical Excellence [2–3], suggest initiation of that drug also in individuals with GFR 46 to <60 ml/min/1.73m<sup>2</sup> and continuation with additional caution and dose reduction whenever GFR declines to 30–45 ml/min/1.73m<sup>2</sup>.

This position was also confirmed by Inzucchi et al. in a recent systematic review of 65 studies investigating upon the risk of lactic acidosis associated to metformin use. They concluded for a less strict approach to metformin treatment might be chosen, although with caution, in patients with T2DM and mild or moderate chronic kidney disease entangling lower doses and careful follow-up of kidney function [8]. These Authors also strongly suggested to refrain from using metformin in patients with GFR below 30 ml/min to avoid the risk of both lactic acidosis and of increased mortality previously shown to be associated with metformin use in patients

having serum creatinine concentrations greater than 530 µmol/L [12].

Although the use of metformin in our sample declined with age, the frequent inappropriate use of this drug in the elderly clearly stands out from our data. In fact, 13.4% (n=309) of the oldest patients with eGFR below 30 ml/min/1.73m<sup>2</sup> were on metformin (alone or in combination with insulin), and thus at high risk for major complications.

Epidemiological data show suboptimal adherence to different guidelines, which have recommended various kidney function thresholds for metformin restriction in CKD. Our results are in keeping with data from Huang et al. who retrospectively reviewed metformin-treated patients with T2DM admitted to major teaching Hospitals in Australia. They reported that about 31% of these patients received the drug inappropriately, given the presence of contraindications. Kidney failure (i.e. GFR below 30 ml/min/1.73m<sup>2</sup>) was one of the most frequent contraindication [21]. In a study of 83,850 US veterans ≥ 65 years of age with creatinine clearance ranging 15–49 ml/min, metformin was among the 3 medications altogether accounting for 76% of renally misprescribed medications among patients with 30–49 ml/min creatinine clearance rate [22] and, according to the previously quoted systematic review [8], among patients with kidney-related contraindication, as many as one-third were still prescribed metformin.

The awareness of risks associated with metformin misuse is increasing. In fact, a recent survey by Koro C et al. analyzing oral antidiabetic drug utilization

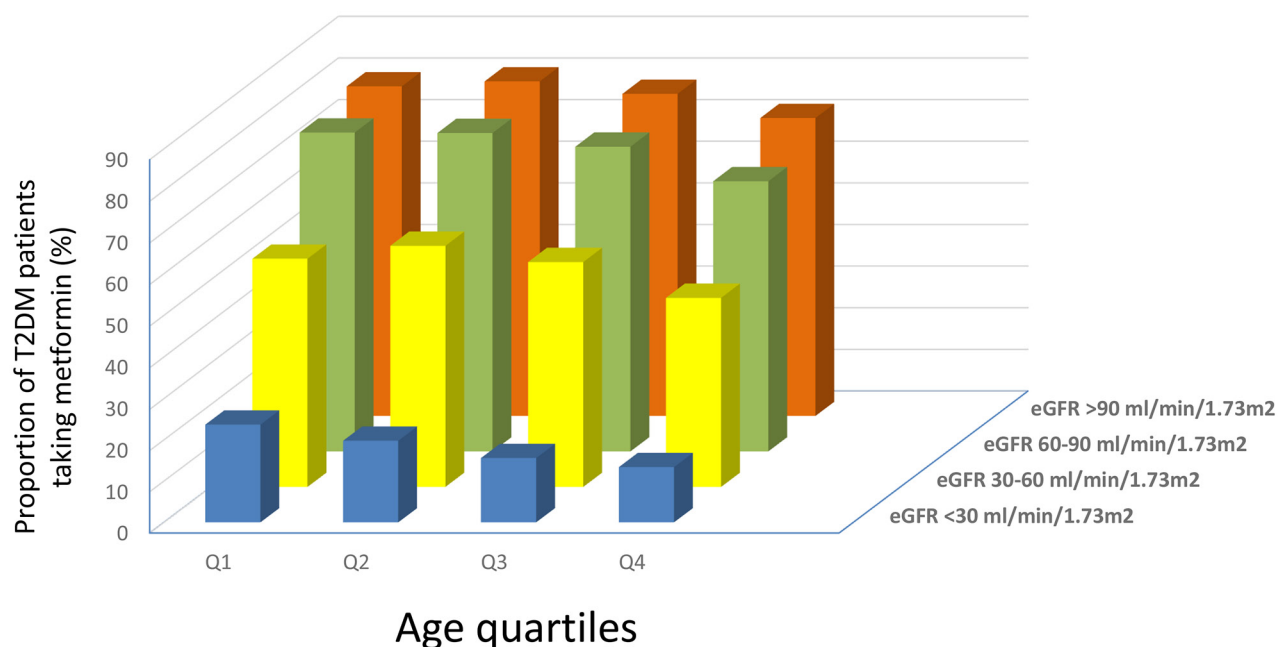

**Figure 1: Proportion of T2DM patients taking metformin according to age quartiles and eGFR classes.**

rates by 1,462 patients with T2DM and chronic kidney disease from the US NANHES IV database, found that 43.4% was taking OADs (24.0% were on sulphonylureas) but no patient with stage 4 and 5 CKD was taking metformin [13].

The reason why the inappropriate use of metformin is quite diffuse is beyond the aim of this survey. However, the evidence that not all physicians follow clinical practice guidelines [23] and that therapeutic inertia is still an issue [24] could account, at least in part, for metformin misuse. Furthermore, the barriers to start insulin therapy especially in elderly may have also contributed [25]. In addition, the fact that quality of care delivered to the patients did not differ according to age or eGFR classes allows us to rule out any clinical approach inequalities.

Our study has some limitations as well as several strengths. Among the former, we need to say that the data were collected in the 2011, when the use of new innovative antihyperglycemic agents such as DPP-4 inhibitors, GLP-1 agonist or Glifozin was still trivial. In this regard, it is anyway worth to underline that these new classes of drugs are still underused in Italy [26]. Second, we have no information on metformin dosage and duration of treatment. On the other hand, we should mention the large size of the study cohort and the homogeneous geographical distribution of the recruiting centers, which certainly contribute to make the study population a good representation of real-life clinical practice. Furthermore, as some drugs sharing similar pharmacologic mechanisms (i.e. Sulphonylureas and Repaglinide) were pooled together in our database, we were unable to carry out separate analyses for each individual drug class.

In conclusion, although recent guidelines have taken a less stringent stance about contraindications to metformin treatment, clinical risk associated to the use of this drug remains high and should be avoided in the presence of severe CKD. Herewith reported and discussed data indicating the persistence of a significant degree of inappropriateness in the prescription of this drug, call to action for implementing more suitable use of antihyperglycemic drugs, especially in older patients with kidney dysfunction.

## METHODS

### Study setting, study patients and data sources

In the present report we analyzed a large cohort of patients with T2DM followed-up at 207 diabetes centers in Italy among those affiliated to the Italian Association of Clinical Diabetologists initiative aiming to investigate the use of antihyperglycemic treatment, according to age and kidney function. The centers participated in the study are homogeneously distributed throughout the country. The analysis was performed using the data set of electronic medical records collected between 1 January

and 31 December 2011. For the purpose of the analysis, we considered only patients who were  $\geq 18$  years old and with data about estimated GFR (eGFR) and albuminuria. The study population consisted of 157,595 individuals with T2DM.

### Data collection

Data from all participating centers were collected and centrally analyzed anonymously. The results were internally approved by the AMD Annals scientific committee. The diagnosis of T2DM was made at participating Diabetes Centers according to the American Diabetes Association 2003 criteria. This initiative includes measuring and monitoring HbA1c, blood pressure, low-density lipoprotein, total and high density lipoprotein cholesterol, triglycerides and serum uric acid by high standard auto-analyzers in public laboratories successfully participating in nationwide quality control programs. The use of specific classes of drugs (metformin, other AHA, statins and anti-hypertensive agents) was also evaluated. Kidney function was assessed by serum creatinine and urinary albumin excretion measurements. GFR was estimated for each patient using a standardized serum creatinine assay and the CKD-EPI formula [27]. To be included in the study, the patients had to have at least one measurement of serum creatinine, with concordant eGFR values, in the 3 months prior to study entry. Increased urinary albumin excretion was diagnosed as: i) microalbuminuria if urinary albumin concentration was  $>30$  and  $\leq 300$  mg/l, or if UAE rate was  $>20$  and  $\leq 200$   $\mu\text{g}/\text{min}$ , or if urinary albumin-to-creatinine ratio (ACR) was  $>2.5$  mg/mmol in men and  $>3.5$  mg/mmol in women and  $\leq 30$  mg/mmol in both genders; ii) macroalbuminuria if urinary albumin concentration was  $>300$  mg/l, or if UAE rate was  $>200$   $\mu\text{g}/\text{min}$ , or if ACR was  $>30$  mg/mmol in both genders. Albuminuria indicated patients with either micro- or macroalbuminuria. At each participating center, all patients underwent physical examination and BP measurements according to a standardized protocol. Information on the presence of diabetic retinopathy was also available.

Quality of care was assessed through the Q score, which was developed as part of the study QuED and subsequently validated in the study QUASAR [28].

### Statistical analysis

Data are given as mean values  $\pm$  standard deviation (SD); categorical variables are described as frequencies and percentages. Mixed regression models, with diabetes clinics fitted as random effect to consider possible differences in data across centres, were used to compare patients' characteristics by groups. Continuous and categorical variables were analyzed, respectively, by linear and logistic mixed regression models. P values of  $<0.05$



were considered statistically significant. The analyses were made using STATA software, Version 14 (StataCorp, College Station, Texas).

### Author contributions

SDC, FV, SG and RP designed the study, analyzed and interpreted data and wrote the manuscript;

AC, PP, CG, FS analyzed data, wrote the manuscript and contributed to discussion and reviewed the manuscript; PG analyzed data and contributed to discussion; PF, GR contributed to discussion and reviewed the manuscript. All the authors approved the final version for publication.

### ACKNOWLEDGMENTS

We thank the Associazione Medici Diabetologi for its support.

### CONFLICTS OF INTEREST

None declared.

### FUNDING

None

### REFERENCES

1. World Health Organization (WHO). Diabetes Fact sheet. Reviewed November 2016 WHO website. <http://www.who.int/mediacentre/factsheets/fs312/en/> 17 January 2017.
2. American Diabetes Association. Pharmacologic approaches to glycemic treatment. *Diabetes Care*. 2017;40: S64-S74.
3. National Institute for Health and Care Excellence. Type 2 diabetes in adults: management. NICE guideline [NG28]. Published date: December 2015.
4. Emslie-Smith AM, Boyle DI, Evans JM, Sullivan F, Morris AD. Contraindications to metformin therapy in patients with Type 2 diabetes – a population-based study of adherence to prescribing guidelines. *Diabet Med*. 2001; 18:483-88.
5. Sulkin TV, Bosman D, Krentz AJ. Contraindications to metformin therapy in patients with NIDDM. *Diabetes Care*. 1997; 20:925-28.
6. Holstein A, Nahrwold D, Hinze S, Egberts EH. Contraindications to metformin therapy are largely disregarded. *Diabet Med*. 1999; 16:692-96.
7. Scheen AJ. Clinical pharmacokinetics of metformin. *Clin Pharmacokinet*. 1996; 30:359-71.
8. Inzucchi SE, Lipska KJ, Mayo H, Bailey CJ, McGuire DK. Metformin in patients with type 2 diabetes and kidney disease: a systematic review. *JAMA*. 2014; 312:2668-75. doi: 10.1001/jama.2014.15298.
9. Crowley MJ, Diamantidis CJ, McDuffie JR, Cameron CB, Stanifer JW, Mock CK, Wang X, Tang S, Nagi A, Kosinski AS, Williams JW Jr. Clinical outcomes of metformin use in populations with chronic kidney disease, congestive heart failure, or chronic liver disease: a systematic review. *Ann Intern Med*. 2017; 166:191-200. doi: 10.7326/M16-1901.
10. Ekström N, Schiöler L, Svensson AM, Eeg-Olofsson K, Miao Jonasson J, Zethelius B, Cederholm J, Eliasson B, Gudbjörnsdóttir S. Effectiveness and safety of metformin in 51675 patients with type 2 diabetes and different levels of renal function: a cohort study from the Swedish National Diabetes Register. *BMJ Open*. 2012; 2:e001076.
11. Huang ES, Davis AM. Glycemic control in older adults with diabetes mellitus. *JAMA*. 2015;314:1509-10. doi:10.1001/jama.2015.8345.
12. Hung SC, Chang YK, Liu JS, Kuo KL, Chen YH, Hsu CC, Tarnag DC. Metformin use and mortality in patients with advanced chronic kidney disease: national, retrospective, observational, cohort study. *Lancet Diabetes Endocrinol*. 2015; 3:605-14.
13. Koro CE, Lee BH, Bowlin SJ. Antidiabetic medication use and prevalence of chronic kidney disease among patients with type 2 diabetes mellitus in the United States. *Clin Ther*. 2009; 31:2608-17.
14. De Cosmo S, Viazzi F, Pacilli A, Giorda C, Ceriello A, Gentile S, Russo G, Rossi MC, Nicolucci A, Guida P, Feig D, Johnson RJ, Pontremoli R, AMD-Annals Study Group. Serum uric acid and risk of CKD in type 2 diabetes. *Clin J Am Soc Nephrol*. 2015; 10: 1921-9.
15. Ismail-Beigi F, Moghissi E, Tiktin M, Hirsch IB, Inzucchi SE, Genuth S. Individualizing glycemic targets in type 2 diabetes mellitus: implications of recent clinical trials. *Ann Intern Med*. 2011; 154:554-9.
16. Schloot NC, Haupt A, Schütt M, Badenhop K, Laimer M, Nicolay C, Reaney M, Fink K, Holl RW. Risk of severe hypoglycemia in sulfonylurea-treated patients from diabetes centers in Germany/Austria: how big is the problem? Which patients are at risk? *Diabetes Metab Res Rev*. 2016; 32:316-24.
17. Pilemann-Lyberg S, Thorsteinsson B, Snorgaard O, Zander M, Vestergaard H, Røder ME. Severe hypoglycemia during treatment with sulphonylureas in patients with type 2 diabetes in the Capital Region of Denmark. *Diabetes Res Clin Pract*. 2015; 110:202-7. doi: 10.1016/j.diabetes.2015.09.006.
18. Effect of intensive blood-glucose control with metformin on complications in overweight patients with type 2 diabetes (UKPDS 34). UK Prospective Diabetes Study (UKPDS) Group. *Lancet*. 1998 Sep 12;352:854-65.
19. Eppenga WL, Lalmohamed A, Geerts AF, Derijks HJ, Wensing M, Egberts A, De Smet PA, de Vries F. Risk of lactic acidosis or elevated lactate concentrations in metformin users with renal impairment: a population-based cohort study. *Diabetes Care*. 2014; 37:2218-24. doi: 10.2337/dc13-3023.

20. Richy FF, Sabidó-Espin M, Guedes S, Corvino FA, Gottwald-Hostalek U. Incidence of lactic acidosis in patients with type 2 diabetes with and without renal impairment treated with metformin: a retrospective cohort study. *Diabetes Care*. 2014; 37:2291-5. doi: 10.2337/dc14-0464.
21. Huang W, Peterson GM, Zaidi ST, Castelino RL. Metformin utilisation in Australian community and aged care settings. *Diabetes Res Clin Pract*. 2015; 108:336-41.
22. Chang F, O'Hare AM, Miao Y, Steinman MA. Use of renally inappropriate medications in older veterans: a national study. *J Am Geriatr Soc*. 2015; 63:2290-7.
23. Cabana MD, Rand CS, Powe NR, Wu AW, Wilson MH, Abboud PA, Rubin HR. Why don't physicians follow clinical practice guidelines? A framework for improvement. *JAMA*. 1999; 282:1458-1465.
24. Phillips LS, Branch WT, Cook CB, Doyle JP, El-Kebbi IM, Gallina DL, Miller CD, Ziemer DC, Barnes CS. Clinical inertia. *Ann Intern Med*. 2001; 135:825.
25. Cucinotta D, Russo GT. Biphasic insulin aspart in the treatment of type 2 diabetes mellitus. *Expert Opin Pharmacother*. 2009; 10:2905-11.
26. Osservatorio ARNO Diabete Il profilo assistenziale della popolazione con diabete [http://www.siditalia.it/images/Documenti/NEWS/Rapporto\\_Arno\\_Diabete\\_2015.pdf](http://www.siditalia.it/images/Documenti/NEWS/Rapporto_Arno_Diabete_2015.pdf), 15 January 2015.
27. Levey AS, Stevens LA, Schmid CH, Zhang YL, Castro AF 3rd, Feldman HI, Kusek JW, Eggers P, Van Lente F, Greene T, Coresh J, CKD-EPI (Chronic Kidney Disease Epidemiology Collaboration). A new equation to estimate glomerular filtration rate. *Ann Intern Med*. 2009; 150:604-12.
28. Rossi MC, Lucisano G, Comaschi M, Coscelli C, Cucinotta D, Di Blasi P, Bader G, Pellegrini F, Valentini U, Vespasiani G, Nicolucci A, AMD-QUASAR Study Group. Quality of diabetes care predicts the development of cardiovascular events: results of the AMD-QUASAR study. *Diabetes Care*. 2011; 34:347-52. doi: 10.2337/dc10-1709.
